# Supplementary material for: Matching Errors in Zinc Finger Recognition Reveal the Ultimate Physical Limits of Molecular Specificity
Source: Research Square preprint supplement (doi:10.21203/rs.3.rs-8691230/v1), 2026-02-17
Supplement: Supplementary file 1 [file 41c248621d64dadf2b5c98c4.docx]

# Supplementary Information

Title: Matching Errors in Zinc Finger Recognition Reveal the Ultimate Physical Limits of Molecular Specificity

Author: Chandrika Murugaiah, PhD

This Supplementary Information file provides extended methodological details, theoretical derivations, and additional explanatory text supporting the main manuscript.

## Supplementary Methods

1. Thermodynamic Model of Zinc Finger–DNA Binding

Zinc finger–DNA binding was modeled using a statistical mechanical framework in which each protein–DNA complex occupies a microstate i characterized by a binding free energy ΔG_i. The probability of occupying state i is given by:

P_i = exp(-ΔG_i / k_BT) / Σ_j exp(-ΔG_j / k_BT)

where k_B is the Boltzmann constant and T is temperature.

Discrimination between cognate and near-cognate sites is determined by ΔΔG = ΔG_near-cognate − ΔG_cognate.

2. Information-Theoretic Analysis

Information transmission was estimated using Shannon entropy:

I = Σ p(x) log2 [p(x)/q(x)]

where p(x) represents the probability distribution of cognate recognition and q(x) represents background binding probabilities.

## Supplementary Discussion

These analyses demonstrate that zinc finger specificity approaches the theoretical maximum permitted by thermodynamic and informational constraints. Minor deviations reflect intrinsic energetic degeneracy rather than experimental noise or design failure.

## Supplementary Figures

Figure S1. Schematic of energy-level discretization arising from Zn²⁺ coordination geometry.

Figure S2. Conceptual free-energy landscape showing overlapping basins for cognate and near-cognate DNA sequences.
